# Supplementary figures and images for: The transcriptional network activated by Cln3 cyclin at the G1-to-S transition of the yeast cell cycle
Source: Springer Nature journal article supplement (doi:10.1186/gb-2010-11-6-r67), 2010-06-23

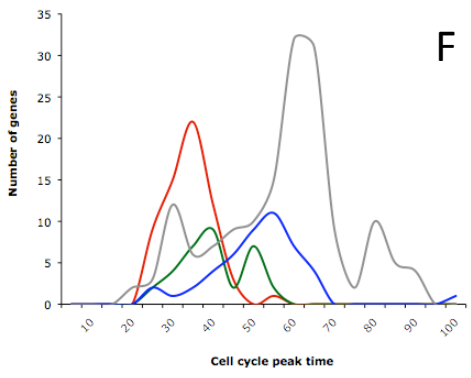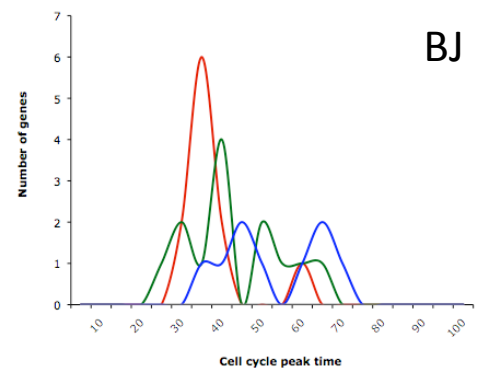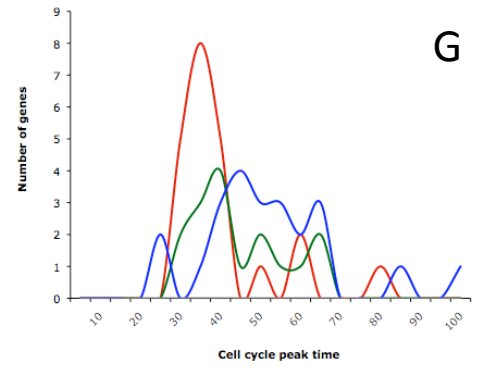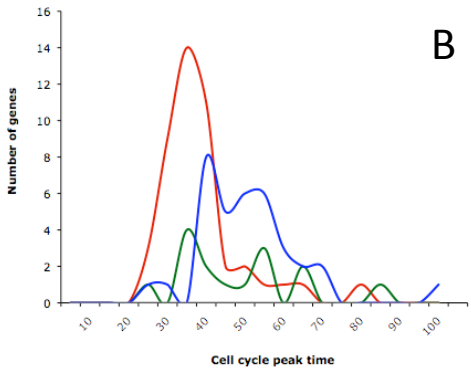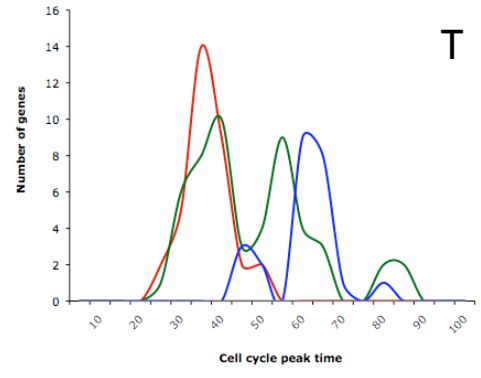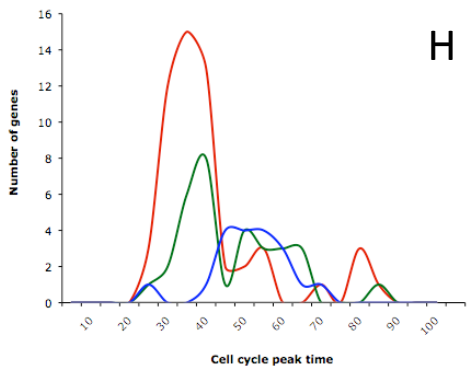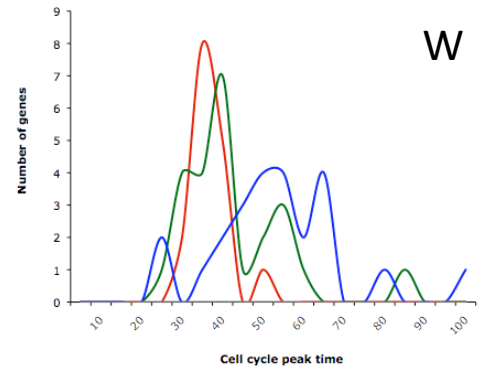

Deactivation

Supplement: Additional file 6 [file gb-2010-11-6-r67-s6.pdf]
